---

# THE ROLE OF ARTIFICIAL INTELLIGENCE IN MODERN MEDICAL EDUCATION AND PRACTICE: A SYSTEMATIC LITERATURE REVIEW

---

Shiva Rasouli \*, Duha Alkurdi\*, Bochen Jia

Department of Industrial and Manufacturing Systems Engineering  
University of Michigan  
Dearborn, Michigan, USA  
{shivarsl, alkurdi, bochenj}@umich.edu

## ABSTRACT

The integration of Artificial Intelligence (AI) into medical education has emerged as a transformative element in the modern healthcare educational system. With the exponential growth of medical knowledge and the increasing complexity of healthcare systems, AI offers innovative solutions to enhance learning outcomes, facilitate personalized education pathways, and improve clinical decision-making skills among medical professionals. This literature review explores the transformative role of AI in the training of healthcare providers, focusing on advancements in medical education, medical diagnostics, and emergency care training. Additionally, it addresses the readiness of healthcare professionals to employ AI technologies, analyzing their current knowledge, attitudes, and the training provided. By synthesizing findings from multiple studies, we aim to highlight AI's potential to enhance medical education, address challenges, and propose future directions for integrating AI into healthcare training.

**Keywords** Artificial Intelligence, Medical Education, Healthcare Practices

## 1 Introduction

### 1.1 Background

The field of medicine is inherently complex and continuously evolving, driven by a constantly expanding knowledge base. Advances in medical research, technological innovations, and shifts in healthcare practices contribute to this growth. As new diseases are identified and innovative treatments are developed, medical education becomes increasingly intricate. It is crucial for medical professionals to not only acquire extensive knowledge during their education but also to keep up with the latest developments, techniques, and treatments throughout their careers. Ongoing education is vital for delivering effective patient care as well as ensuring that practitioners remain competent and relevant in this fast-paced, ever-changing field.

Traditional medical education, which has been grounded in classroom learning, hands-on training, and mentorship, focuses on six fundamental areas: patient care, medical knowledge, communication skills, continuous learning, professionalism, and systemic practice [1, 2, 3]. This education system prioritizes deep knowledge acquisition, heavily relying on memorization to prepare students for patient care [4]. Traditional methods, such as classroom instruction, often fall short of capturing the complex, unpredictable nature of real-life medical scenarios. Hands-on training, though valuable, is frequently constrained by resource availability, from patient access to practical opportunities such as in surgery [5]. Additionally, the variability in mentorship quality, dependent on a mentor's expertise and time, can affect

---

\*These authors contributed equally to this work and they share the first authorship of this manuscript.

## AI in Medical Education: A Review

the consistency and depth of a medical student's learning experience. As we advance, integrating Artificial Intelligence (AI) and other technological innovations into medical training could revolutionize educational methods, making them more adaptive, efficient, and reflective of contemporary medical practices.

AI is recognized for its ability to replicate tasks that usually require human intelligence, such as analyzing data and making decisions [6]. One of its key advantages is efficiency; AI can process and analyze extensive datasets much faster than humans. Additionally, AI operates continuously, with no human limitations like fatigue, ensuring high accuracy and speed. This is particularly beneficial in healthcare education, where AI can facilitate personalized learning, simulate clinical scenarios for training, and update educational content based on the latest research and clinical practices. These capabilities make AI a powerful tool in enhancing the training of healthcare professionals, leading to improved patient care and innovative medical practices.

AI-based methods are revolutionizing the way medical professionals learn, practice, and perfect their skills [7, 8, 9]. AI can provide a scalable and consistent educational experience, mitigating the limitations of traditional mentorship and resource-dependent training [10]. Virtual simulations and AI-driven virtual patients, for instance, offer medical students and professionals the opportunity to practice and improve their skills in a controlled environment [11, 12, 13, 14]. A study in Johns Hopkins Bayview Medical Center in Baltimore, Maryland, found that just 9 hours of deliberate practice with real-world virtual patient simulations significantly increased the diagnostic skills of internal medicine interns in evaluating dizziness [15]. These simulations can be designed to mimic a wide range of medical conditions and scenarios, providing a diverse and comprehensive training experience that might be difficult to achieve in the real world. Moreover, AI algorithms that assist in reading radiological images, are not only used in clinical settings but also as a teaching tool, enabling students to compare their analyses with AI-generated interpretations [16].

The integration of AI into medical training represents a transformative shift not only in educational methodologies but also in the preparation of medical professionals for a technologically advanced future [17, 18, 19, 20]. In contemporary clinical practice, AI and other digital tools are becoming foundational components, reshaping patient care, diagnostics, and treatment planning. This evolution necessitates a parallel transformation in medical education, where traditional training methods are increasingly supplemented with AI-driven technologies. By integrating AI into the curriculum, educational institutions aim to equip future medical professionals with the necessary skills to utilize these advanced technologies effectively. Familiarity with AI-driven tools, sophisticated data analysis techniques, and digital health applications is crucial, as these competencies will become central to the efficacy of healthcare delivery.

This literature review critically assesses the integration of AI in medical education and practice. It focuses on providing a comprehensive analysis of how AI tools are currently used and their impact on learning and patient care. Moreover, it explores what strategies can be adopted to foster the readiness of healthcare providers for utilizing AI. By gathering and evaluating evidence from various studies, this review will help educators, healthcare professionals, and policymakers make informed decisions about effectively incorporating AI technologies into medical education and practice.

### 1.2 Research Purpose

Given the complexity and dynamic nature of the medical field, where continuous learning and adaptation are crucial, the role of AI in healthcare education is increasingly important.

This literature review paper aims to shed light on the role of AI in training healthcare providers. Specifically, we seek to address these research questions:

1. How is AI utilized as an innovative educational and practice solution for healthcare professionals?
2. What strategies can be employed to foster readiness to use AI among healthcare professionals?

The first question aims to identify and explore the various ways AI is being used in medical education. The significance of this inquiry lies in its potential to reveal innovative methods for training healthcare professionals. By understanding how AI is currently utilized, we can identify best practices, gaps, and opportunities for further innovation. This can lead to more effective, efficient, and engaging training methods, ultimately enhancing the skill set of healthcare providers. The second question addresses the challenge of integrating new technologies into the healthcare sector. The significance of this question lies in the understanding that the successful implementation of AI in medical training requires not only technological solutions but also the readiness and engagement of healthcare professionals. By identifying strategies to promote readiness, this research can contribute to smoother and more effective integration of AI in medical education. This is key to ensuring that healthcare professionals are equipped to work alongside emerging technologies and leverage them for improved patient care.

The specific objective of this systematic review is strategically designed to comprehensively assess the impact of AI in medical education.

## 2 Methods

### 2.1 Design and Search

In conducting the systematic literature review, a comprehensive search was carried out across three major databases: Scopus, Google Scholar, and PubMed. Utilizing three distinct searching syntaxes, ("*Nurse OR Patient AND Training AND AI*"), ("*Artificial Intelligence AND Health Care AND Training AND Patient*") and ("*Artificial Intelligence AND Health Care AND Training*") a pool of 295 papers was initially identified, followed by a two steps screening. The first step involved screening abstracts to quickly identify and exclude studies that clearly did not meet the inclusion criteria. The second step involved a methods review of the studies that were included after the first screening step to confirm their relevance and quality in addressing the research questions and meeting all inclusion criteria. These steps resulted in 32 papers being considered for the full review.

### 2.2 Inclusion & Exclusion Criteria

Studies that discuss the use of AI in medical education or training, including its impact on learning processes and effectiveness were included in this literature review. Additionally, research that investigates the readiness of healthcare practitioners to adopt AI, examining their attitudes and knowledge, was included. To ensure a comprehensive understanding, both qualitative and quantitative studies have been included to capture diverse methodologies and insights. These criteria help to concentrate on how AI is integrated into medical education and the acceptance of this technology in the healthcare sector.

Specific exclusion criteria were established to maintain the focus and relevance of the literature review. First, papers not written in English were excluded to ensure that all data was accessible and clear. Second, studies that examine the use of AI in domains other than healthcare were omitted, as the research specifically targets AI's implications for medical professionals. These criteria helped streamline our review by filtering out studies that did not align with our research objectives.

## 3 Results & Discussion

Following the initial round of paper extraction, a total of 295 papers were identified, those papers met the searching syntaxes across the three platforms. Subsequently, 227 papers were excluded during the first screening process as they did not meet the inclusion criteria. During the methods review process, the count of papers was narrowed down to 32. A summary of these findings is presented in the PRISMA chart depicted in Figure 1.

This literature review paper aims to shed light on the role of AI in training healthcare providers. Specifically, seeks to address two research questions. Table 1 presents a summary of the 32 papers included in this literature review, outlining their main objectives, implications, study results, and limitations.

### 3.1 AI as Innovative Education and Practice in Healthcare

AI is revolutionizing the training of healthcare professionals by providing innovative solutions that enhance learning and improve patient care outcomes [21]. For instance, in one study, first-year medical students reported that evaluating ChatGPT enhanced their grasp of the complexities in clinical cases [22]. In another study, integrated virtual and face-to-face simulation has been utilized to enhance clinical judgment and healthcare students' understanding of patients' experiences, offering a more immersive and effective training environment than traditional methods alone [14]. In one study, Truong et al. (2022)[23] have demonstrated the efficacy of AI-enhanced virtual reality simulation in preparing healthcare teams for emergency situations, such as operating room (OR) fires. Their study highlights the value of AI in creating realistic, high-stakes training scenarios that improve preparedness and confidence. Moreover, Seo et al. (2023)[24] contribute by introducing VR SBIRT training with conversational AI, providing nursing students with diverse, interactive learning scenarios [24]. This capability is crucial for preparing students to handle unexpected challenges in real-world clinical settings, ultimately leading to better preparedness and confidence in patient care. Thus, AI-based training methods are not only more adaptive and immersive but also provide a comprehensive platform for learning that traditional methods struggle to match.

Building on this foundation, AI's influence extends to health practice, preparing professionals for future challenges with advancements in decision-making, patient monitoring, and care coordination. This progression indicates a smooth shift from education to practice, where AI continues to play a pivotal role in enhancing the capabilities of healthcare professionals [17]. Additionally, the adoption of AI tools like ChatGPT and generative models in nursing education is reshaping the field [25, 26]. These tools facilitate continuous education, provide advice, and ensure easy access to

## AI in Medical Education: A Review

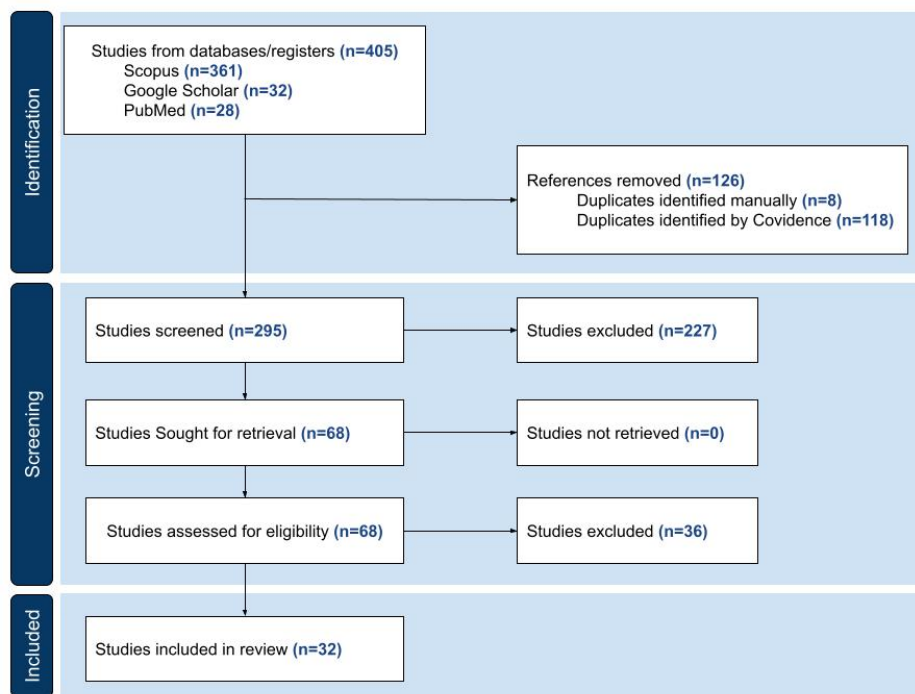

Figure 1: PRISMA chart

information while prioritizing ethical standards and data privacy. By integrating these tools, health education is not only about acquiring knowledge but also about understanding how to leverage technology to improve care delivery and patient outcomes.

In medical diagnostics, AI tools such as the Ex-DBC, a neuro-fuzzy rule-based expert system, are enhancing the precision of breast cancer diagnoses and reducing unnecessary biopsies [27]. AI also simplifies complex procedures for healthcare providers, exemplified by the automated assessment of left ventricular ejection fraction with ultrasound devices by oncology staff. This application streamlines cardiac evaluations, enabling efficient and accurate assessments by non-specialists and ultimately improving patient outcomes [28].

Within professional training, AI is playing a pivotal role in improving the precision and safety of clinical practices. Chen and Wang (2023) [29] have contributed to this progress by introducing an AI-assimilated Preventive Training Measure (AI-PTM) that enhances medical training for fitness nurses, focusing on the reduction of needle injury incidence and promoting preventive measures.

Given these, AI is reshaping healthcare training and practice by enhancing learning environments with advanced simulations and tools, improving both educational outcomes and patient care. These innovations can offer a seamless transition from educational settings to clinical practice, equipping professionals with essential skills for modern healthcare challenges.

### 3.2 Strategies to Foster Readiness to Use AI in Healthcare

To foster readiness to use AI among healthcare professionals, it is crucial to adopt a comprehensive approach that addresses the multifaceted dimensions of AI integration into healthcare. The necessity of integrating AI education into healthcare curricula is foundational to clarifying AI for healthcare professionals [17, 18, 20, 30]. For example, the importance of education and training in enhancing readiness for AI in healthcare settings is highlighted by Taskiran (2023) [18], who investigated the impact of an artificial intelligence course on nursing students' readiness for medical AI. This study found that introducing AI education early in the curriculum significantly increased students' confidence and willingness to engage with AI technologies, underscoring the necessity of embedding AI training within healthcare education frameworks. Similarly, Rony et al. (2024) [17] assessed how AI could advance nursing practice, suggesting that AI's potential to improve decision support, patient monitoring, and care coordination necessitates a foundational

## AI in Medical Education: A Review

understanding of AI among nursing professionals. Al-Sabawy (2023) [30] reveals that a comprehensive and accessible AI education in nursing can significantly address concerns and enhance the integration of AI into nursing practices.

The study by Hussein Mohamed et al. (2023) [31] highlights the critical role of continuous educational workshops and feedback in enhancing AI acceptance among healthcare professionals. The study found that nurses' primary sources of information on artificial intelligence were the Internet, TV, and Facebook. After an educational program, there was a notable improvement in both their knowledge and attitudes toward AI. This emphasizes the necessity for continuous training and assistance to effectively incorporate AI into healthcare routines.

Further, hands-on experience with AI tools, builds confidence in healthcare professionals, allowing them to view AI as an augmentation of their skills. For instance, Seo et al. (2023) [24] used a virtual reality platform with conversational AI for nursing students to practice patient interactions, enhancing their clinical skills through immersive learning. Similarly, Narang et al. (2021) [32] employed a deep-learning algorithm to guide novices in performing echocardiograms, showing AI's ability to augment medical training. These studies demonstrate the value of hands-on experience with AI tools in building healthcare professionals' confidence and competence.

Ethical and professional integrity concerns are also paramount [33, 34, 35, 36]. Gosak et al. (2024) [25] explored nurses' perceptions and readiness regarding AI, finding a broad recognition of AI's role in supporting nursing work, but also a clear need for ethical guidelines to navigate the integration of AI in patient care effectively. Berşe et al. (2024) [26], highlighted that AI chatbots, like ChatGPT, have the potential to enhance the nursing educational experience by offering personalized learning opportunities to students, but stresses the need for careful consideration of ethical issues and information accuracy to protect patient care. In another study, the authors recommend prioritizing three main areas to promote responsible use of AI, including the creation of a strong ethical framework [34]. These studies underscore the necessity of addressing ethical considerations in AI deployment, highlighting that such efforts can significantly influence healthcare professionals' acceptance of AI technologies.

Effective AI integration requires well-established infrastructure and supportive policies. Al Dossari and Ammar (2022) [12] explore innovative tools in medical training, such as virtual reality (VR) and augmented reality (AR), highlighting the need for infrastructural and policy frameworks that support the adoption of these advanced technologies. Their research suggests that immersive learning environments enabled by VR and AR can significantly enhance the medical training experience, pointing to the broader implications of supportive policies and infrastructure in facilitating the integration of AI into healthcare education.

In summary, the successful integration of AI into healthcare practices requires a strategic approach that includes education, continuous workshops, ethical considerations, and supportive policies. By addressing these key aspects, healthcare organizations can ensure readiness among healthcare professionals for the effective utilization of AI technologies, thereby enhancing patient care and operational efficiency.

Table 1: Characteristics of included studies

| Author(s)         | Year | Title                                                                                                                                                 | Research objective                                                                                                                                                                                                                                             | Implications                                                                                                                                                                                              | Results                                                                                                                                                                                                                                                                                                                                                                                                                                        | Limitation(s)                                                                                                                                                                                                                                                                                                                                          |
|-------------------|------|-------------------------------------------------------------------------------------------------------------------------------------------------------|----------------------------------------------------------------------------------------------------------------------------------------------------------------------------------------------------------------------------------------------------------------|-----------------------------------------------------------------------------------------------------------------------------------------------------------------------------------------------------------|------------------------------------------------------------------------------------------------------------------------------------------------------------------------------------------------------------------------------------------------------------------------------------------------------------------------------------------------------------------------------------------------------------------------------------------------|--------------------------------------------------------------------------------------------------------------------------------------------------------------------------------------------------------------------------------------------------------------------------------------------------------------------------------------------------------|
| Yang et al. [14]  | 2024 | Integrated virtual simulation and face-to-face simulation for clinical judgment training among undergraduate nursing students: A mixed-methods study. | Evaluating the effect of an integrated non-immersive virtual simulation and high-fidelity face-to-face simulation program on enhancing nursing students' clinical judgment ability and understanding nursing students' experiences of the combined simulation. | Integrating simulation programs across various clinical settings.                                                                                                                                         | Combining virtual and face-to-face simulations significantly improves nursing students' clinical judgment skills more than face-to-face simulation alone.                                                                                                                                                                                                                                                                                      | Reliance on self-reported clinical judgment, lack of long-term skill retention assessment, and no comparison of specific scores or time spent in simulations.                                                                                                                                                                                          |
| Rony et al. [17]  | 2024 | Advancing nursing practice with artificial intelligence: Enhancing preparedness for the future.                                                       | Assessing how artificial intelligence (AI) can advance nursing practice and prepare for future healthcare challenges.                                                                                                                                          | Transform nursing practice by improving decision-making, patient monitoring, and care coordination, alongside emphasizing the importance of AI education and addressing ethical challenges in healthcare. | The results show AI's significant impact on improving clinical decision support, patient monitoring, predictive analytics, and care coordination in nursing practice. It also underscores the need for AI education and ethical considerations in healthcare.                                                                                                                                                                                  | -                                                                                                                                                                                                                                                                                                                                                      |
| Gosak et al. [25] | 2024 | The ChatGPT effect and transforming nursing education with generative AI: Discussion paper.                                                           | Exploring nurses' perceptions and readiness regarding Artificial Intelligence (AI) in nursing, focusing on how it may impact their work and patient care.                                                                                                      | A need for AI education in nursing, proper training, ethical guidelines, and viewing AI as a supportive tool rather than a replacement for human care.                                                    | The study found that a significant portion of nurses have learned about AI through different sources. Most nurses have a moderate to high perception of AI's role in nursing, with a vast majority displaying a positive attitude towards adopting AI in their practice.                                                                                                                                                                       | -                                                                                                                                                                                                                                                                                                                                                      |
| Berşe et al. [26] | 2024 | The role and potential contributions of the artificial intelligence language model ChatGPT.                                                           | The paper's objective is to assess how ChatGPT can assist nurses by offering continuous education, advice, and easy access to information, while also considering potential risks to nurse-patient relationships and data privacy.                             | Integrating AI chatbots like ChatGPT in nursing practice.                                                                                                                                                 | AI chatbots, like ChatGPT, have the potential to enhance nursing intervention by offering educational and informational support, but stresses the need for careful consideration of ethical issues and information accuracy to protect patient care.                                                                                                                                                                                           | A focus on immediate implications of AI chatbots in nursing without extensive long-term data. It suggests future research should explore the sustained impact on healthcare outcomes, patient satisfaction, and ethical considerations, emphasizing the need for comprehensive guidelines to navigate AI integration in clinical settings effectively. |
| Taskiran [18]     | 2023 | Effect of artificial intelligence course in nursing on students' medical artificial intelligence readiness: a comparative quasi-experimental study.   | To investigate how the inclusion of an artificial intelligence (AI) course in the nursing curriculum affected students' preparedness for utilizing medical AI.                                                                                                 | Integrating an AI nursing course into the curriculum to enhance students' preparedness for engaging with medical AI technologies.                                                                         | A significant proportion of students in both the experimental and control groups advocated for the inclusion of an AI course in the nursing curriculum. Notably, the experimental group showed stronger support for this integration compared to the control group. Moreover, the experimental group exhibited higher mean scores for medical AI readiness, with a corresponding significant effect size observed for the course on readiness. | -                                                                                                                                                                                                                                                                                                                                                      |

Continued on next page

| Author(s)                   | Year | Title                                                                                                                                        | Research objective                                                                                                                                                                                                                                | Implications                                                                                                                                                                                                                       | Results                                                                                                                                                                                                                                                                                                                                                                                                                                                                                                                                                              | Limitation(s) |
|-----------------------------|------|----------------------------------------------------------------------------------------------------------------------------------------------|---------------------------------------------------------------------------------------------------------------------------------------------------------------------------------------------------------------------------------------------------|------------------------------------------------------------------------------------------------------------------------------------------------------------------------------------------------------------------------------------|----------------------------------------------------------------------------------------------------------------------------------------------------------------------------------------------------------------------------------------------------------------------------------------------------------------------------------------------------------------------------------------------------------------------------------------------------------------------------------------------------------------------------------------------------------------------|---------------|
| Seo et al. [24]             | 2023 | Development of virtual reality SBIRT skill training with conversational AI in nursing education                                              | Enhance nursing education by allowing students to practice SBIRT skills with a virtual patient powered by conversational AI, offering a diverse selection of simulated environments and personalized training.                                    | The VR simulation system provides a practical, efficient, and immersive learning resource for SBIRT education, potentially transforming approaches to nursing education by leveraging the capabilities of VR and conversational AI | Virtual reality combined with conversational AI significantly improves nursing education, particularly in SBIRT training, by offering realistic and interactive learning experiences that enhance student competencies in patient interaction and procedures.                                                                                                                                                                                                                                                                                                        | -             |
| Ravi et al. [19]            | 2023 | Large language models and medical education: Preparing for a rapid transformation in how trainees will learn to be doctors.                  | The study aimed to investigate how Large Language Models (LLMs) could transform medical education and practice, particularly focusing on their impact on the learning and clinical skills of medical trainees.                                    | Integrating LLMs such as ChatGPT, and Med-PaLM, into clinical practice.                                                                                                                                                            | LLMs in healthcare education: shaping future training, documentation, and development with trainee input.                                                                                                                                                                                                                                                                                                                                                                                                                                                            | -             |
| Priya and Dinesh Peter [37] | 2023 | Enhanced defensive model using cnn against adversarial attacks for medical education through human computer interaction.                     | To develop a healthcare learning platform that utilizes human-computer interface technology, Artificial Intelligence, and Machine Learning Techniques to provide healthcare education to medical practitioners as well as the general public.     | Enhancing the education of medical practitioners and the general public in physiological and medical subjects, thereby contributing to the advancement of national healthcare.                                                     | The enhanced model presented in the paper, trained with both normal and adversarial chest X-ray images using Convolutional Neural Networks, significantly improved disease prediction accuracy to 95% for adversarial images, showcasing its robustness against adversarial attacks and its effectiveness in healthcare applications.                                                                                                                                                                                                                                | -             |
| Papadopoulou et al. [28]    | 2023 | Use of artificial intelligence for the automatic assessment of left ventricular ejection fraction by oncology staff in chemotherapy patients | The paper's goal is to explore the practicality and precision of oncology staff employing AI-equipped portable ultrasound devices to autonomously measure the left ventricular ejection fraction in patients undergoing chemotherapy.             | AI-enabled handheld ultrasounds can streamline cardiac assessments in chemotherapy patients, enhancing care by enabling quick, non-specialist heart health evaluations.                                                            | AI-enabled handheld ultrasound devices are effective and accurate for non-specialists in assessing left ventricular ejection fraction in chemotherapy patients, indicating a promising tool for enhancing cardiac care in oncology settings.                                                                                                                                                                                                                                                                                                                         | -             |
| Lattuca et al. [38]         | 2023 | Healthcare AI: A Revised Quebec framework for nursing education                                                                              | Proposing a revised framework for nursing education in Quebec in the context of healthcare AI. The framework aims to address the need for reviewing existing nursing curricula and ongoing skills development for professionals working with AIHT | Integrating AIHT competencies into nursing curricula on a national and international scale to ensure safe and effective patient care.                                                                                              | Five key competencies are recommended for inclusion in curricula: 1- Applying informatics and digital health technology knowledge in nursing practice (Theory). 2- Understanding AIHT and its benefits and limitations (Theory). 3- Safely and effectively using AIHT in nursing practice (Application in Practice). 4- Contributing to the development of AIHT guidelines, considering ethical, social, and legal factors (Application in Practice). 5- Participating in the development of AIHT training for continuing nurse education (Application in Practice). | -             |

Continued on next page

| Author(s)                   | Year | Title                                                                                                                                                                                 | Research objective                                                                                                                                                                                                                                                                                                                                                                                                                                                                                                                                          | Implications                                                                                                                                                                                                                                                      | Results                                                                                                                                                                                                                                                                                                                                                                | Limitation(s)                                                                                                                                                                                                                                                                                                                                                                                         |
|-----------------------------|------|---------------------------------------------------------------------------------------------------------------------------------------------------------------------------------------|-------------------------------------------------------------------------------------------------------------------------------------------------------------------------------------------------------------------------------------------------------------------------------------------------------------------------------------------------------------------------------------------------------------------------------------------------------------------------------------------------------------------------------------------------------------|-------------------------------------------------------------------------------------------------------------------------------------------------------------------------------------------------------------------------------------------------------------------|------------------------------------------------------------------------------------------------------------------------------------------------------------------------------------------------------------------------------------------------------------------------------------------------------------------------------------------------------------------------|-------------------------------------------------------------------------------------------------------------------------------------------------------------------------------------------------------------------------------------------------------------------------------------------------------------------------------------------------------------------------------------------------------|
| Hussein Mohamed et al. [31] | 2023 | The effect of educational program on nurses' knowledge and attitude regarding artificial intelligence.                                                                                | Assessing the impact of an educational program on nurses' understanding and perspectives concerning artificial intelligence.                                                                                                                                                                                                                                                                                                                                                                                                                                | Underscores the significance of educational initiatives in enhancing nurses' comprehension and attitudes toward artificial intelligence. It stresses the necessity for continuous training and assistance to effectively incorporate AI into healthcare routines. | Holding continuous workshops and training to enhance nurses' understanding and integration of AI into their practice.                                                                                                                                                                                                                                                  | -                                                                                                                                                                                                                                                                                                                                                                                                     |
| Frehywot and Vovides [39]   | 2023 | An equitable and sustainable community of practice framework to address the use of artificial intelligence for global health workforce training                                       | The paper aims to address the use of artificial intelligence (AI) for global healthforce training. The paper focuses on AI to see the full context of what it is meant to learn and stresses the importance of not allowing AI trained with biased data to perpetuate biases and structural inequities in health workforce training. The objective is to develop partnerships among various stakeholders to create an equitable and sustainable Communities of Practice (CoP) framework that can guide the use of AI in health workforce training globally. | Investing in AI technology for health workforce training.                                                                                                                                                                                                         | The paper outlines a framework for establishing a Community of Practice (CoP) that includes five structural pillars: governance, project management, partnership, stakeholder engagement, and outreach. These pillars support a CoP model aimed at cross-fertilization of AI knowledge among stakeholders.                                                             | -                                                                                                                                                                                                                                                                                                                                                                                                     |
| Chen and Wang [29]          | 2023 | Training on the incidence of needle injury and preventive measures for fitness nurses at different stages of clinical practice                                                        | Introducing an Artificial Intelligence-assimilated Preventive Training Measure (AI-PTM) aimed at enhancing the quality of medical training for fitness nurses by addressing common errors and improving patient care skills.                                                                                                                                                                                                                                                                                                                                | Enhancing nursing training sessions, and improvements in training accuracy and precision handling.                                                                                                                                                                | The results indicate that the proposed method leads to improvements in training accuracy and precision, with reductions in both error rates and time complexity.                                                                                                                                                                                                       | -                                                                                                                                                                                                                                                                                                                                                                                                     |
| Boo and Oh [40]             | 2023 | Perceptions of registered nurses on facilitators and barriers of implementing the AI-IoT-based healthcare pilot project for older adults during the COVID-19 pandemic in South Korea. | The aim of this study was to examine registered nurses' perspectives on the facilitators and barriers to implementing an AI/IoT-based healthcare pilot project in South Korea. This project targeted older adults over 65 years old, aiming to prevent frailty and enhance health behaviors through the provision of Bluetooth-enabled smart devices like blood pressure and blood glucose meters.                                                                                                                                                          | The role of AI-IoT technologies in enhancing healthcare services for elderly individuals.                                                                                                                                                                         | The AI-IoT-based healthcare pilot project received positive feedback from participants, resulting in heightened client satisfaction and better health behaviors. Government backing and financial support played vital roles in the project's success. Yet, technical difficulties and variations in digital literacy among older adults emerged as notable obstacles. | The pilot program's limited deployment may restrict broader applicability. Maintaining unbiased interviews was challenging due to the involvement of RN-PHCs, potentially impacting response accuracy. Low adoption rates among home-visiting healthcare service users suggest obstacles to wider acceptance. Further research is needed to validate data from RN-PHCs and address these limitations. |

Continued on next page



| Author(s)               | Year | Title                                                                                                                               | Research objective                                                                                                                                                                                                                                                                                                                                                  | Implications                                                                                                                                                                          | Results                                                                                                                                                                                                                                                                                                                                                                                                                                                                                                                                                                                                                                               | Limitation(s)                                                                                                                                                                                                                                                                                                                                                                                                                                                                              |
|-------------------------|------|-------------------------------------------------------------------------------------------------------------------------------------|---------------------------------------------------------------------------------------------------------------------------------------------------------------------------------------------------------------------------------------------------------------------------------------------------------------------------------------------------------------------|---------------------------------------------------------------------------------------------------------------------------------------------------------------------------------------|-------------------------------------------------------------------------------------------------------------------------------------------------------------------------------------------------------------------------------------------------------------------------------------------------------------------------------------------------------------------------------------------------------------------------------------------------------------------------------------------------------------------------------------------------------------------------------------------------------------------------------------------------------|--------------------------------------------------------------------------------------------------------------------------------------------------------------------------------------------------------------------------------------------------------------------------------------------------------------------------------------------------------------------------------------------------------------------------------------------------------------------------------------------|
| Alkhaaldi et al. [41]   | 2023 | Medical student experiences and perceptions of ChatGPT and artificial intelligence: Cross-sectional study                           | To assess graduating medical students' viewpoints regarding ChatGPT and artificial intelligence within their education and forthcoming careers.                                                                                                                                                                                                                     | Effectively equip medical students for the upcoming integration of AI into the field of medicine.                                                                                     | Most respondents indicated they didn't use ChatGPT during medical school. Only a small fraction utilized it for written assessments or clinical tasks. However, a significant portion expressed intentions to integrate it into their residency training, particularly for learning new medical concepts and preparing for exams. Male students tended to hold more optimistic views about AI's potential benefits in healthcare compared to their female counterparts. Those with prior exposure to AI generally had more positive perceptions about its role in improving patient care, reducing medical errors, and enhancing diagnostic accuracy. | Respondents had limited experience with ChatGPT due to its recent launch. Data was collected from one hospital, limiting generalizability despite respondents from multiple medical schools and countries. Only graduating medical students were surveyed, but understanding all medical trainees' and faculty's perspectives is crucial. Additionally, the cross-sectional design provides only a snapshot view, lacking insight into long-term trends or changes in attitudes over time. |
| Al-Sabawy [30]          | 2023 | Artificial intelligence in nursing: A study on nurses' perceptions and readiness                                                    | To explore nurses' attitudes and perceptions towards the implementation of AI in nursing, potentially transforming their jobs and patient care delivery.                                                                                                                                                                                                            | The need for comprehensive and accessible AI education in nursing to address concerns and enhances AI's integration into nursing practices, ultimately improving healthcare delivery. | 84% of nurses demonstrated a positive attitude towards adopting AI in their practice, with knowledge about AI mainly gained through various platforms. Educational level influenced nurses' attitudes towards AI.                                                                                                                                                                                                                                                                                                                                                                                                                                     | Variability in understanding AI among nurses, and the resilience on passive channels for AI knowledge, which may not provide a comprehensive understanding necessary for practical applications.                                                                                                                                                                                                                                                                                           |
| Truong et al. [23]      | 2022 | Does your team know how to respond safely to an operating room fire? Outcomes of a virtual reality, AI-enhanced simulation training | To assess the ability of interprofessional participants to respond to virtual reality (VR)-simulated operating room (OR) fire scenarios. It evaluated the impact of VR simulation training, with and without AI assistance, on participants' performance and confidence in managing OR fires.                                                                       | Improving healthcare professionals' preparedness in high-risk environments like the OR.                                                                                               | Only a small fraction of participants responded correctly to the OR fire scenario on their first attempt without AI guidance. With AI assistance, a significant increase in pass rates was observed.                                                                                                                                                                                                                                                                                                                                                                                                                                                  | The potential influence of repeated simulation attempts on improved performance rather than AI guidance alone. Additionally, the research was conducted over a short period, which may have allowed participants to share knowledge outside the study environment, potentially affecting the results. The VR platform also only allowed for individual participation, not reflecting the team-based nature of OR fire response.                                                            |
| Meetoo and Ochieng [42] | 2022 | AIM in nursing practice                                                                                                             | To explore how AI technologies can transform nursing practice, enhancing the delivery of collaborative, compassionate, ethically sound, and evidence-based patient care. It addresses the potential of AI to alleviate global staff shortages and funding growth issues in healthcare, driven by an aging population living with complex chronic health conditions. | The integration of AI into healthcare, advancements in patient care quality.                                                                                                          | Outlining various AI applications in nursing and healthcare, including robotics and machine learning.                                                                                                                                                                                                                                                                                                                                                                                                                                                                                                                                                 | -                                                                                                                                                                                                                                                                                                                                                                                                                                                                                          |

Continued on next page

| Author(s)                 | Year | Title                                                                                                                                                                                                                                                                                              | Research objective                                                                                                                                                                                                                                                                                                                                                                                                                 | Implications                                                                                                                                                                                                                                                                                               | Results                                                                                                                                                                                                                                                                                                                                                                                                                                                                                                             | Limitation(s)                                                                                                                                                                                                                                                                                                                                                                                                                    |
|---------------------------|------|----------------------------------------------------------------------------------------------------------------------------------------------------------------------------------------------------------------------------------------------------------------------------------------------------|------------------------------------------------------------------------------------------------------------------------------------------------------------------------------------------------------------------------------------------------------------------------------------------------------------------------------------------------------------------------------------------------------------------------------------|------------------------------------------------------------------------------------------------------------------------------------------------------------------------------------------------------------------------------------------------------------------------------------------------------------|---------------------------------------------------------------------------------------------------------------------------------------------------------------------------------------------------------------------------------------------------------------------------------------------------------------------------------------------------------------------------------------------------------------------------------------------------------------------------------------------------------------------|----------------------------------------------------------------------------------------------------------------------------------------------------------------------------------------------------------------------------------------------------------------------------------------------------------------------------------------------------------------------------------------------------------------------------------|
| Koech et al. [43]         | 2022 | Acceptability and feasibility of a low-cost device for gestational age assessment in a low-resource setting: qualitative study.                                                                                                                                                                    | To assess the perceptions of pregnant women, their families, and healthcare workers regarding the feasibility and acceptability of the TraCer device in an appropriate setting.                                                                                                                                                                                                                                                    | Improving antenatal care efficiency and reducing healthcare costs. Preparing healthcare professionals to leverage AI tools for improved patient care, especially in low-resource environments.                                                                                                             | The study implies that using the TraCer device in low-resource settings can improve antenatal care by accurately assessing gestational age, thus enhancing maternal and fetal health outcomes. It also underscores the need for clear communication and further validation of such technologies.                                                                                                                                                                                                                    | The study's limitations include potential social desirability bias and unrealistic perceptions from using video demonstrations, suggesting the need for real-world testing and further evaluation.                                                                                                                                                                                                                               |
| Jha et al. [44]           | 2022 | Undergraduate medical students' and interns' knowledge and perception of artificial intelligence in medicine                                                                                                                                                                                       | To explore medical students' and interns' knowledge of AI, perceptions of AI's role in medicine, and preferences around AI competencies teaching.                                                                                                                                                                                                                                                                                  | Integrating AI and machine learning topics into medical curricula to better prepare students for future healthcare challenges.                                                                                                                                                                             | Limited knowledge of AI among students, with a median AI knowledge score of 11 out of 25. The scores were higher for final-year students and for those with additional AI training.                                                                                                                                                                                                                                                                                                                                 | The research was conducted at a single medical school, which may not represent the knowledge and perceptions of all medical students in Nepal.                                                                                                                                                                                                                                                                                   |
| Drogt et al. [45]         | 2022 | Integrating Artificial Intelligence in Pathology: A Qualitative Interview Study of Users' Experiences and Expectations                                                                                                                                                                             | The study aimed to understand how artificial intelligence (AI) tools can be optimally aligned with the medical and social context of pathology daily practice. The study focused on professionals' perspectives on the possibilities, conditions and prerequisites for AI integration in pathology.                                                                                                                                | Supporting AI integration by following three main recommendations: foster a pragmatic attitude towards AI development, provide task-sensitive information and training to healthcare professionals working in pathology departments, and take time to reflect on user changing roles and responsibilities. | The study identified key prerequisites for successful AI implementation, including the necessity of digital workflows, financial considerations, a realistic perspective on AI value, and diverse attitudes towards digital transitions. The study also proposed recommendations to align AI design with medical practices and emphasized a pragmatic approach to AI development, task-specific training for professionals, and reflection on the changing roles and responsibilities within pathology departments. | The study was conducted during the pandemic, limiting access to the departments themselves. Adding to this the perspective of professionals from non-digital and non-academic pathology departments were not included which could have provided a broader view of the expectations and implications of AI in pathology. The translation of the interviews from Dutch to English could lead to a potential reduction in subtlety. |
| Al Dossari and Ammar [12] | 2022 | The future tools for medical training, assessment, and certification                                                                                                                                                                                                                               | To examine the evolving landscape of medical training, emphasizing the integration of advanced technologies such as Virtual Reality (VR), Augmented Reality (AR), and robotic surgery. Seeking to explore how these technologies can enhance the educational experience by providing immersive, interactive learning environments, improving the acquisition of skills, and addressing the challenges of modern medical education. | The adoption of these future tools in medical training.                                                                                                                                                                                                                                                    | Providing insights into various innovative tools that can be used in medical training and education. These include VR simulations for surgical training, AR for real-time information overlay during procedures, AI for personalized learning paths and assessment, and ML for analyzing training outcomes.                                                                                                                                                                                                         | -                                                                                                                                                                                                                                                                                                                                                                                                                                |
| Jalal et al. [46]         | 2021 | Exploring the role of Artificial Intelligence in an emergency and trauma radiology department Explore how AI can assist in managing the increased imaging volume and workload in emergency and trauma radiology departments, enhancing patient care quality while alleviating radiologist burnout. | Implementing AI could lead to significant benefits in patient safety, care quality, and healthcare costs reduction. emphasizing the importance of a radiologist-centered framework to integrate AI effectively into the workflow.                                                                                                                                                                                                  | AI can support various aspects of the radiology workflow, including order entry, imaging protocolling, acquisition, post-processing, and decision support. Potentially, increase efficiency, reduce turnaround times, and improve diagnostic accuracy.                                                     | The complexity of training and validating AI systems, ethical considerations, and the need for a multidisciplinary approach to address technical and practical challenges in implementing AI in emergency and trauma radiology settings.                                                                                                                                                                                                                                                                            |                                                                                                                                                                                                                                                                                                                                                                                                                                  |

Continued on next page

| Author(s)             | Year | Title                                                                                                                 | Research objective                                                                                                                                                                                                                                                                                                                                                                                                   | Implications                                                                                                                                                                          | Results                                                                                                                                                                                                                                                                                                                                               | Limitation(s)                                                                                                                                                                                                                                                                                                                                                         |
|-----------------------|------|-----------------------------------------------------------------------------------------------------------------------|----------------------------------------------------------------------------------------------------------------------------------------------------------------------------------------------------------------------------------------------------------------------------------------------------------------------------------------------------------------------------------------------------------------------|---------------------------------------------------------------------------------------------------------------------------------------------------------------------------------------|-------------------------------------------------------------------------------------------------------------------------------------------------------------------------------------------------------------------------------------------------------------------------------------------------------------------------------------------------------|-----------------------------------------------------------------------------------------------------------------------------------------------------------------------------------------------------------------------------------------------------------------------------------------------------------------------------------------------------------------------|
| Gillan et al. [47]    | 2021 | Health care professional association agency in preparing for artificial intelligence: Protocol for a multi-case study | To present a study protocol exploring how health professional associations address AI as a transformative technology. It focuses on their sense-making processes and legitimization of change to support membership readiness for future practice changes due to AI integration.                                                                                                                                     | Offering guidance on AI implementation and the application of normalization process theory (NPT) at a macro level, considering the associations' engagement with AI.                  | The domains of collective action and reflexive monitoring within the framework of normalization process theory (NPT) will serve as the main focus for evaluating prospective practice models, skills, and potential adjustments to the fields of professional practice and education that fall under the purview of health professional associations. | The paper notes anticipated variations among health professional associations in their engagement with AI, which may affect direct comparison and analysis. The exploratory nature of the study, focusing on anticipation of AI impact rather than existing implementations, and the challenges posed by COVID-19 on data collection are acknowledged as limitations. |
| Narang et al. [32]    | 2021 | Utility of a deep-learning algorithm to guide novices to acquire echocardiograms for limited diagnostic use.          | To assess whether novices could use deep-learning (DL) based software to obtain diagnostic-quality transthoracic echocardiographic studies.                                                                                                                                                                                                                                                                          | Enabling novices to perform diagnostic echocardiography using AI, expanding its accessibility in limited-resource settings or where immediate cardiac assessment is needed.           | Novices achieved diagnostic-quality scans for key cardiac parameters in 98.8% of cases for left ventricular size and pericardial effusion and in 92.5% of cases for right ventricular size, showing that DL assistance can nearly match the diagnostic quality of scans taken by sonographers without AI assistance.                                  | Limited generalizability due to a small sample size and exclusion of patients from certain medical settings (ICUs, emergency departments), and reliance on the medical background of the nurses, which might have influenced the outcome.                                                                                                                             |
| Lamanna [48]          | 2021 | Task-sharing with artificial intelligence: A design hypothesis for an emergency unit in sub-Saharan Africa            | To address the shortage of emergency care providers in sub-Saharan Africa by proposing a model that combines task-sharing and artificial intelligence (AI). The model suggests sharing tasks traditionally performed by physicians and nurses with lay providers, supervised by AI, to improve emergency care delivery.                                                                                              | Enhancing patient care, reducing medical errors, and saving costs by allowing clinicians to focus on more complex cases while lay providers manage routine care under AI supervision. | AI supervision in emergency units could lead to more consistent, high-value care compared to traditional models.                                                                                                                                                                                                                                      | The proposed model is hypothetical and lacks empirical data comparing clinician-led and AI-led emergency care. Additionally, potential risks related to the accuracy of AI predictions and the adherence of lay providers to AI recommendations.                                                                                                                      |
| Zarowitz [49]         | 2020 | Emerging pharmacotherapy and health care needs of patients in the age of artificial intelligence and digitalization   | To explore the impact of artificial intelligence (AI) on healthcare, emphasizing the need for healthcare professionals to adapt and adopt the AI technologies. Outlining the essential AI technologies, including expert systems, robotic process automation, natural language processing, machine learning, and deep learning, and discusses the importance of building AI literacy among healthcare professionals. | Improve healthcare delivery using AI, integrating it in education to ensure rapid adoption within the healthcare sector.                                                              | Healthcare professionals who engage in AI education and training can significantly influence the successful integration of AI technologies in healthcare, leading to improved patient care and outcomes.                                                                                                                                              | -                                                                                                                                                                                                                                                                                                                                                                     |
| Wiljer and Hakim [20] | 2019 | Developing an artificial intelligence-enabled health care practice: Rewiring health care professions for better care. | Enhancing healthcare practices with artificial intelligence (AI), focusing on preparing healthcare professionals to adapt and evolve with AI technologies for better care delivery.                                                                                                                                                                                                                                  | Ensuring effective, safe, and compassionate care by emphasizing the need for AI literacy among healthcare professionals.                                                              | Strategies for building digital and AI literacy, including data governance, statistics, data visualization, and understanding AI's impact on clinical processes, aiming to bridge the gap between technology advancement and organizational readiness.                                                                                                | -                                                                                                                                                                                                                                                                                                                                                                     |

Continued on next page

| Author(s)          | Year | Title                                                                                               | Research objective                                                                                                                                                                                                                                             | Implications                                                                                                                                                                                                                   | Results                                                                                                                                                                                                                                                                                                                                                                                                                                              | Limitation(s)                                                                                                                                                                                                                                                                                                                                                                                                                  |
|--------------------|------|-----------------------------------------------------------------------------------------------------|----------------------------------------------------------------------------------------------------------------------------------------------------------------------------------------------------------------------------------------------------------------|--------------------------------------------------------------------------------------------------------------------------------------------------------------------------------------------------------------------------------|------------------------------------------------------------------------------------------------------------------------------------------------------------------------------------------------------------------------------------------------------------------------------------------------------------------------------------------------------------------------------------------------------------------------------------------------------|--------------------------------------------------------------------------------------------------------------------------------------------------------------------------------------------------------------------------------------------------------------------------------------------------------------------------------------------------------------------------------------------------------------------------------|
| Sarwar et al. [50] | 2019 | Physician perspectives on integration of artificial intelligence into diagnostic pathology          | To examine perspective on AI implementation in clinical practice among the pathology community, taking into consideration their opinions and concerns regarding the integration of AI into the diagnostic pathology.                                           | Using AI technology in diagnostic specialities like radiology and pathology.                                                                                                                                                   | The survey, involving 487 respondents from more than 50 countries, revealed generally positive attitudes towards the implementation of AI in pathology, with around 75% of the respondents expressing their interest and excitement toward the technology. 80% of the responses anticipated the introduction of AI technology in pathology laboratories within the next decade. Concerns regarding job displacement were also part of the responses. | The survey had limitations including difficulty in quantifying responses bias, and verifying the identity of responses due to its anonymous and voluntary nature. The majority of responses were from North America and Europe, potentially underrepresenting perspectives from other regions. Additionally, the possibility exists that respondents might have had stronger opinions on AI in pathology than non-respondents. |
| Lee et al. [51]    | 2017 | A Survey on medical robotic telepresence design from the perspective of medical staff               | Understanding the design factors of robotic telepresence in medical settings from the perspective of medical staff, with a focus on investigating how these systems can be optimized to meet the needs and preferences of doctors, nurses, and administrators. | Designing and implementing robotic telepresence technologies in healthcare that can better understand the specific needs and contexts of medical staff which may lead to more effective and acceptable telepresence solutions. | Findings indicated medical staff's concerns about operation, physical interaction viability, and system adaptability to medical services. Design preferences were categorized into usage context, functionality, and appearance, highlighting the importance of trust, efficiency in communication, and professional appearance for medical robotic systems.                                                                                         | The qualitative nature of the study and the specific focus on medical staff's perspectives without directly considering patients' views.                                                                                                                                                                                                                                                                                       |
| Keleş et al. [27]  | 2011 | Expert system based on neuro-fuzzy rules for diagnosis breast cancer                                | Developing Ex-DBC (Expert system for Diagnosis of Breast Cancer) utilizing neuro-fuzzy rules to differentiate between benign and malignant mammographic findings, aiming to reduce unnecessary biopsies and enhance diagnostic accuracy for breast cancer.     | Integrating artificial intelligence in medical diagnostics to improve decision-making processes.                                                                                                                               | Ex-DBC demonstrated high diagnostic accuracy with 97% specificity, 76% sensitivity, 96% positive predictive value, and 81% negative predictive value.                                                                                                                                                                                                                                                                                                | -                                                                                                                                                                                                                                                                                                                                                                                                                              |
| Bulka et al. [52]  | 2009 | Automatic meal planning using artificial intelligence algorithms in computer-aided diabetes therapy | Review computer-aided diabetes therapy and introducing GIGISim (m (Glucose-Insulin and Glycemic Index Web Simulator) e-learning tool based on glucose and insulin plasma level simulation models and genetic algorithm optimization                            | Using simulation models and genetic algorithms for optimizing diabetes meal plans.                                                                                                                                             | The system demonstrated educational effectiveness in teaching diet planning and the impact of different foods on blood glucose levels.                                                                                                                                                                                                                                                                                                               | Confined number of factors related to glucose metabolism considered by the model and the challenge of individualizing model parameters for specific diabetes individuals accurately. Additionally, there is variability in output responses in real-life situations and considerations regarding the inclusion of fats in meal plans due to cardiovascular disease risks.                                                      |

## 4 Limitations

This literature review is constrained by its reliance on English-language publications and three primary databases, which might miss relevant non-English and interdisciplinary studies. The challenge of synthesizing findings from diverse methodologies limits the ability to draw generalized conclusions. Additionally, the rapid advancement of AI technology may not be fully represented, and the focus is predominantly on AI's educational uses within healthcare, neglecting its potential impact in other crucial areas.

The reviewed studies have several limitations that impact their validity and applicability. Issues include bias from self-reported measures [14], lack of long-term follow-up [26], limited sample sizes [32], and the specific contexts of the studies which restrict generalizability [40, 45]. Additionally, many studies lack control groups or comparative analyses [14], and some fail to address ethical concerns and the implications of technological bias in AI-driven tools [26]. These limitations highlight the need for more rigorous research designs and comprehensive validation to improve the credibility and scalability of AI and simulation-based educational interventions in healthcare.

## 5 Conclusion

In summary, the integration of AI into healthcare education has been widely embraced due to its capacity to enhance diagnostic precision and simplify intricate medical procedures. Nevertheless, it is important to note the existing gaps in the literature that can guide future research endeavors.

Firstly, it is critical to develop long-term training protocols that not only evaluate the lasting impacts of AI on healthcare training but also ensure continuous updates in the curriculum to reflect rapid technological changes. Secondly, integrating the patient's perspective into AI applications is essential for preserving a patient-centered approach in healthcare. Future investigations should focus on measuring patient satisfaction and the direct impacts of AI-trained professionals on patient outcomes. Thirdly, the advancement in explainable AI (XAI) models is also crucial. Improving the transparency of AI decision-making processes will help build trust and acceptance among healthcare providers, ensuring AI is used ethically in clinical settings. Lastly, the question of accountability in medical decisions involving AI cannot be overlooked. Establishing clear legal and ethical guidelines is imperative to navigate the complexities and maintain trust in AI-enhanced healthcare settings.

Moving forward, addressing these challenges with thorough research and strategic policy making will be pivotal in maximizing the benefits of AI for training healthcare providers and enhancing patient care outcomes.

## References

- [1] C. J. Ramnanan and L. D. Pound, "Advances in medical education and practice: student perceptions of the flipped classroom," pp. 63–73.
- [2] E. Mazur, "Farewell, lecture?" vol. 323, no. 5910, pp. 50–51.
- [3] T. J. Nasca, I. Philibert, T. Brigham, and T. C. Flynn, "The next GME accreditation system—rationale and benefits," vol. 366, no. 11, pp. 1051–1056.
- [4] S. A. Wartman and C. D. Combs, "Medical education must move from the information age to the age of artificial intelligence," vol. 93, no. 8, pp. 1107–1109.
- [5] C. M. D. A. Brandão and P. M. Pêgo-Fernandes, "HANDS-ON: Training simulation in surgery," vol. 141, no. 3, p. e20231413. [Online]. Available: [http://www.scielo.br/scielo.php?script=sci\\_arttext&pid=S1516-31802023000300100&tlng=en](http://www.scielo.br/scielo.php?script=sci_arttext&pid=S1516-31802023000300100&tlng=en)
- [6] S. J. Russell and P. Norvig, *Artificial intelligence a modern approach*. London.
- [7] S. A. Alowais, S. S. Alghamdi, N. Alsuehaby, T. Alqahtani, A. I. Alshaya, S. N. Almohareb, A. Aldairem, M. Alrashed, K. Bin Saleh, H. A. Badreldin, M. S. Al Yami, S. Al Harbi, and A. M. Albekairy, "Revolutionizing healthcare: the role of artificial intelligence in clinical practice," vol. 23, no. 1, p. 689. [Online]. Available: <https://bmcmededuc.biomedcentral.com/articles/10.1186/s12909-023-04698-z>
- [8] T. Davenport and R. Kalakota, "The potential for artificial intelligence in healthcare," vol. 6, no. 2, pp. 94–98. [Online]. Available: <https://www.rcpjournals.org/lookup/doi/10.7861/futurehosp.6-2-94>
- [9] M. Gordon, M. Daniel, A. Ajiboye, H. Uraiby, N. Y. Xu, R. Bartlett, J. Hanson, M. Haas, M. Spadafore, C. Grafton-Clarke *et al.*, "A scoping review of artificial intelligence in medical education: Beme guide no. 84," *Medical Teacher*, vol. 46, no. 4, pp. 446–470, 2024.

AI in Medical Education: A Review

- [10] M. A. Chaudhry and E. Kazim, “Artificial intelligence in education (AIEd): a high-level academic and industry note 2021,” vol. 2, no. 1, pp. 157–165. [Online]. Available: <https://link.springer.com/10.1007/s43681-021-00074-z>
- [11] Q. Wu, Y. Wang, L. Lu, Y. Chen, H. Long, and J. Wang, “Virtual simulation in undergraduate medical education: A scoping review of recent practice,” vol. 9, p. 855403. [Online]. Available: <https://www.frontiersin.org/articles/10.3389/fmed.2022.855403/full>
- [12] M. Al Dossari and A. Ammar, “The future tools for medical training, assessment, and certification,” in *Learning and Career Development in Neurosurgery*, A. Ammar, Ed. Springer International Publishing, pp. 387–403. [Online]. Available: [https://link.springer.com/10.1007/978-3-031-02078-0\\_34](https://link.springer.com/10.1007/978-3-031-02078-0_34)
- [13] N. Khodabakhshian, K. G. Lee, T. Marawi, M. Sorkhou, S. Vyravanathan, and N. Harnett, “Virtual reality for developing patient-facing communication skills in medical and graduate education: Protocol for a scoping review,” vol. 13, no. 1, p. e53901, publisher: JMIR Publications Inc., Toronto, Canada.
- [14] J. Yang, W. J. Zhou, S. C. Zhou, D. Luo, Q. Liu, A.-L. Wang, S.-H. Yu, X.-P. Zhu, X. Y. He, F. Hu, B. X. Yang, and J. Chen, “Integrated virtual simulation and face-to-face simulation for clinical judgment training among undergraduate nursing students: a mixed-methods study,” vol. 24, no. 1, p. 32. [Online]. Available: <https://bmcmeduc.biomedcentral.com/articles/10.1186/s12909-023-04988-6>
- [15] S. Kotwal, M. Fanai, W. Fu, Z. Wang, A. K. Bery, R. Omron, N. Tevzadze, D. Gold, B. T. Garibaldi, S. M. Wright, and D. E. Newman-Toker, “Real-world virtual patient simulation to improve diagnostic performance through deliberate practice: a prospective quasi-experimental study,” vol. 8, no. 4, pp. 489–496. [Online]. Available: <https://www.degruyter.com/document/doi/10.1515/dx-2020-0127/html>
- [16] P. Rajpurkar and M. P. Lungren, “The current and future state of AI interpretation of medical images,” vol. 388, no. 21, pp. 1981–1990. [Online]. Available: <http://www.nejm.org/doi/10.1056/NEJMra2301725>
- [17] M. K. K. Rony, M. R. Parvin, and S. Ferdousi, “Advancing nursing practice with artificial intelligence: Enhancing preparedness for the future,” vol. 11, no. 1, p. nop2.2070. [Online]. Available: <https://onlinelibrary.wiley.com/doi/10.1002/nop2.2070>
- [18] N. Taskiran, “Effect of artificial intelligence course in nursing on students’ medical artificial intelligence readiness: A comparative quasi-experimental study,” vol. 48, no. 5, pp. E147–E152. [Online]. Available: <https://journals.lww.com/10.1097/NNE.0000000000001446>
- [19] A. Ravi, A. Neinstein, and S. G. Murray, “Large language models and medical education: Preparing for a rapid transformation in how trainees will learn to be doctors,” vol. 4, no. 3, pp. 282–292. [Online]. Available: <https://www.atsjournals.org/doi/10.34197/ats-scholar.2023-0036PS>
- [20] D. Wiljer and Z. Hakim, “Developing an artificial intelligence-enabled health care practice: Rewiring health care professions for better care,” vol. 50, no. 4, pp. S8–S14. [Online]. Available: <https://linkinghub.elsevier.com/retrieve/pii/S1939865419305430>
- [21] O. Ng, Z. H. Tay, L. V. E. Wilding, K. B. Ng, and S. P. Han, “Transforming curriculum mapping: A human-ai hybrid approach,” *Medical Education*, vol. 58, no. 5, pp. 582–583, 2024. [Online]. Available: <https://asmelections.onlinelibrary.wiley.com/doi/abs/10.1111/medu.15331>
- [22] A. Kirpalani, J. Grimmer, and P. Z. T. Wang, “Med versus machine: Using chatgpt in team-based learning,” *Medical Education*, vol. 57, no. 11, pp. 1159–1160, 2023. [Online]. Available: <https://asmelections.onlinelibrary.wiley.com/doi/abs/10.1111/medu.15226>
- [23] H. Truong, D. Qi, A. Ryason, A. M. Sullivan, J. Cudmore, S. Alfred, S. B. Jones, J. M. Parra, S. De, and D. B. Jones, “Does your team know how to respond safely to an operating room fire? outcomes of a virtual reality, AI-enhanced simulation training,” vol. 36, no. 5, pp. 3059–3067. [Online]. Available: <https://link.springer.com/10.1007/s00464-021-08602-y>
- [24] J. H. Seo, R. Chaudhury, J.-H. Oh, C. Kicklighter, T. Arguello, E. Wells-Beede, and C. Weston, “Development of virtual reality SBIRT skill training with conversational AI in nursing education,” in *Artificial Intelligence in Education*, N. Wang, G. Rebolledo-Mendez, N. Matsuda, O. C. Santos, and V. Dimitrova, Eds. Springer Nature Switzerland, vol. 13916, pp. 701–707. [Online]. Available: [https://link.springer.com/10.1007/978-3-031-36272-9\\_59](https://link.springer.com/10.1007/978-3-031-36272-9_59)
- [25] L. Gosak, L. Pruinelli, M. Topaz, and G. Štiglic, “The ChatGPT effect and transforming nursing education with generative AI: Discussion paper,” vol. 75, p. 103888. [Online]. Available: <https://linkinghub.elsevier.com/retrieve/pii/S1471595324000179>
- [26] S. Berşe, K. Akça, E. Dirgar, and E. Kaplan Serin, “The role and potential contributions of the artificial intelligence language model ChatGPT,” vol. 52, no. 2, pp. 130–133. [Online]. Available: <https://link.springer.com/10.1007/s10439-023-03296-w>

## AI in Medical Education: A Review

- [27] A. Keleş, A. Keleş, and U. Yavuz, “Expert system based on neuro-fuzzy rules for diagnosis breast cancer,” vol. 38, no. 5, pp. 5719–5726. [Online]. Available: <https://linkinghub.elsevier.com/retrieve/pii/S0957417410012054>
- [28] S. L. Papadopoulou, D. Dionysopoulos, V. Mentessidou, K. Loga, S. Michalopoulou, C. Koukoutzeli, K. Efthymiadis, V. Kantartzi, I. Styliadis, P. Nihoyannopoulos, and V. Sachpekidis, “Use of artificial intelligence for the automatic assessment of left ventricular ejection fraction by oncology staff in chemotherapy patients,” vol. 24, p. jead119.144. [Online]. Available: <https://academic.oup.com/ehjcmimaging/article/doi/10.1093/ehjci/jead119.144/7198872>
- [29] X. Chen and L.-h. Wang, “Training on the incidence of needle injury and preventive measures for fitness nurses at different stages of clinical practice.”
- [30] M. R. Al-Sabawy, “Artificial intelligence in nursing: A study on nurses’ perceptions and readiness.”
- [31] S. Hussein Mohamed, M. Abed El-Rahman Mohamed, S. Farouk Mahmoud, and E. HessienYousef Heggy, “The effect of educational program on nurses’ knowledge and attitude regarding artificial intelligence,” vol. 14, no. 2, pp. 1110–1128. [Online]. Available: [https://ejhc.journals.ekb.eg/article\\_312617.html](https://ejhc.journals.ekb.eg/article_312617.html)
- [32] A. Narang, R. Bae, H. Hong, Y. Thomas, S. Surette, C. Cadieu, A. Chaudhry, R. P. Martin, P. M. McCarthy, D. S. Rubenson, S. Goldstein, S. H. Little, R. M. Lang, N. J. Weissman, and J. D. Thomas, “Utility of a deep-learning algorithm to guide novices to acquire echocardiograms for limited diagnostic use,” vol. 6, no. 6, p. 624. [Online]. Available: <https://jamanetwork.com/journals/jamacardiology/fullarticle/2776714>
- [33] A. G. van der Niet and A. Bleakley, “Where medical education meets artificial intelligence: ‘does technology care?’” *Medical Education*, vol. 55, no. 1, pp. 30–36, 2021. [Online]. Available: <https://asmepublications.onlinelibrary.wiley.com/doi/abs/10.1111/medu.14131>
- [34] M. I. Knopp, E. J. Warm, D. Weber, M. Kelleher, B. Kinnear, D. J. Schumacher, S. A. Santen, E. Mendonça, and L. Turner, “AI-enabled medical education: Threads of change, promising futures, and risky realities across four potential future worlds,” vol. 9, p. e50373, ISBN: 2369-3762 Publisher: JMIR Publications Toronto, Canada.
- [35] K. Masters, “Artificial intelligence in medical education,” *Medical Teacher*, vol. 41, no. 9, pp. 976–980, 2019.
- [36] E. Robleto, A. Habashi, M.-A. B. Kaplan, R. L. Riley, C. Zhang, L. Bianchi, and L. A. Shehadeh, “Medical students’ perceptions of an artificial intelligence (ai) assisted diagnosing program,” *Medical Teacher*, pp. 1–7, 2024.
- [37] K. V. Priya and J. Dinesh Peter, “Enhanced defensive model using CNN against adversarial attacks for medical education through human computer interaction,” pp. 1–13. [Online]. Available: <https://www.tandfonline.com/doi/full/10.1080/10447318.2023.2204697>
- [38] M. Lattuca, D. Maratta, U. Beffert, A. Chevrier, and L. Winer, “Healthcare AI: A revised quebec framework for nursing education,” vol. 9, no. 3. [Online]. Available: <https://qane-afi.casn.ca/journal/vol9/iss3/2>
- [39] S. Frehywot and Y. Vovides, “An equitable and sustainable community of practice framework to address the use of artificial intelligence for global health workforce training,” vol. 21, no. 1, p. 45. [Online]. Available: <https://human-resources-health.biomedcentral.com/articles/10.1186/s12960-023-00833-5>
- [40] S. Boo and H. Oh, “Perceptions of registered nurses on facilitators and barriers of implementing the AI-IoT-based healthcare pilot project for older adults during the COVID-19 pandemic in south korea,” vol. 11, p. 1234626. [Online]. Available: <https://www.frontiersin.org/articles/10.3389/fpubh.2023.1234626/full>
- [41] S. M. Alkhaaldi, C. H. Kassab, Z. Dimassi, L. O. Alsoud, M. Al Fahim, C. Al Hageh, and H. Ibrahim, “Medical student experiences and perceptions of ChatGPT and artificial intelligence: cross-sectional study,” vol. 9, no. 1, p. e51302, publisher: JMIR Publications Inc., Toronto, Canada.
- [42] D. D. Meettoo and B. Ochieng, “AIM in nursing practice,” in *Artificial Intelligence in Medicine*, N. Lidströmer and H. Ashrafiyan, Eds. Springer International Publishing, pp. 743–757. [Online]. Available: [https://link.springer.com/10.1007/978-3-030-64573-1\\_334](https://link.springer.com/10.1007/978-3-030-64573-1_334)
- [43] A. Koech, P. M. Musitia, G. M. Mwashigadi, M.-L. W. Kinshella, M. Vidler, M. Temmerman, R. Craik, P. Von Dadelszen, J. A. Noble, A. T. Papageorgiou, and The PRECISE Network, “Acceptability and feasibility of a low-cost device for gestational age assessment in a low-resource setting: qualitative study,” vol. 9, no. 4, p. e34823. [Online]. Available: <https://humanfactors.jmir.org/2022/4/e34823>
- [44] N. Jha, P. R. Shankar, M. A. Al-Betar, R. Mukhia, K. Hada, and S. Palaian, “Undergraduate medical students’ and interns’ knowledge and perception of artificial intelligence in medicine,” vol. Volume 13, pp. 927–937. [Online]. Available: <https://www.dovepress.com/undergraduate-medical-students-and-interns-knowledge-and-perception-of-peer-reviewed-fulltext-article-AMEP>

## AI in Medical Education: A Review

- [45] J. Drogt, M. Milota, S. Vos, A. Bredenoord, and K. Jongsma, "Integrating artificial intelligence in pathology: a qualitative interview study of users' experiences and expectations," vol. 35, no. 11, pp. 1540–1550. [Online]. Available: <https://linkinghub.elsevier.com/retrieve/pii/S0893395222002204>
- [46] S. Jalal, W. Parker, D. Ferguson, and S. Nicolaou, "Exploring the role of artificial intelligence in an emergency and trauma radiology department," vol. 72, no. 1, pp. 167–174. [Online]. Available: <http://journals.sagepub.com/doi/10.1177/0846537120918338>
- [47] C. Gillan, B. Hodges, D. Wiljer, and M. Dobrow, "Health care professional association agency in preparing for artificial intelligence: Protocol for a multi-case study," vol. 10, no. 5, p. e27340. [Online]. Available: <https://www.researchprotocols.org/2021/5/e27340>
- [48] C. Lamanna, "Task-sharing with artificial intelligence: A design hypothesis for an emergency unit in sub-saharan africa," vol. 38, no. 1.
- [49] B. J. Zarowitz, "Emerging pharmacotherapy and health care needs of patients in the age of artificial intelligence and digitalization," vol. 54, no. 10, pp. 1038–1046. [Online]. Available: <http://journals.sagepub.com/doi/10.1177/1060028020919383>
- [50] S. Sarwar, A. Dent, K. Faust, M. Richer, U. Djuric, R. Van Ommeren, and P. Diamandis, "Physician perspectives on integration of artificial intelligence into diagnostic pathology," vol. 2, no. 1, p. 28. [Online]. Available: <https://www.nature.com/articles/s41746-019-0106-0>
- [51] H. Lee, Y. Kim, and A. Bianchi, "A survey on medical robotic telepresence design from the perspective of medical staff," vol. 30, no. 1, p. 61. [Online]. Available: [http://aodr.org/\\_common/do.php?a=full&bidx=717&aidx=9772](http://aodr.org/_common/do.php?a=full&bidx=717&aidx=9772)
- [52] J. Bulka, A. Izvorski, J. Koleszynska, J. Lis, and I. Wochlik, "Automatic meal planning using artificial intelligence algorithms in computer aided diabetes therapy," in *2009 4th International Conference on Autonomous Robots and Agents*. IEEE, pp. 393–397. [Online]. Available: <https://ieeexplore.ieee.org/document/4803989/>



Identification

Studies from databases/registers (n=405)  
Scopus (n=361)  
Google Scholar (n=32)  
PubMed (n=28)

References removed (n=126)  
Duplicates identified manually (n=8)  
Duplicates identified by Covidence (n=118)

Screening

Studies screened (n=295)

Studies excluded (n=227)

Studies Sought for retrieval (n=68)

Studies not retrieved (n=0)

Studies assessed for eligibility (n=68)

Studies excluded (n=36)

Included

Studies included in review (n=32)

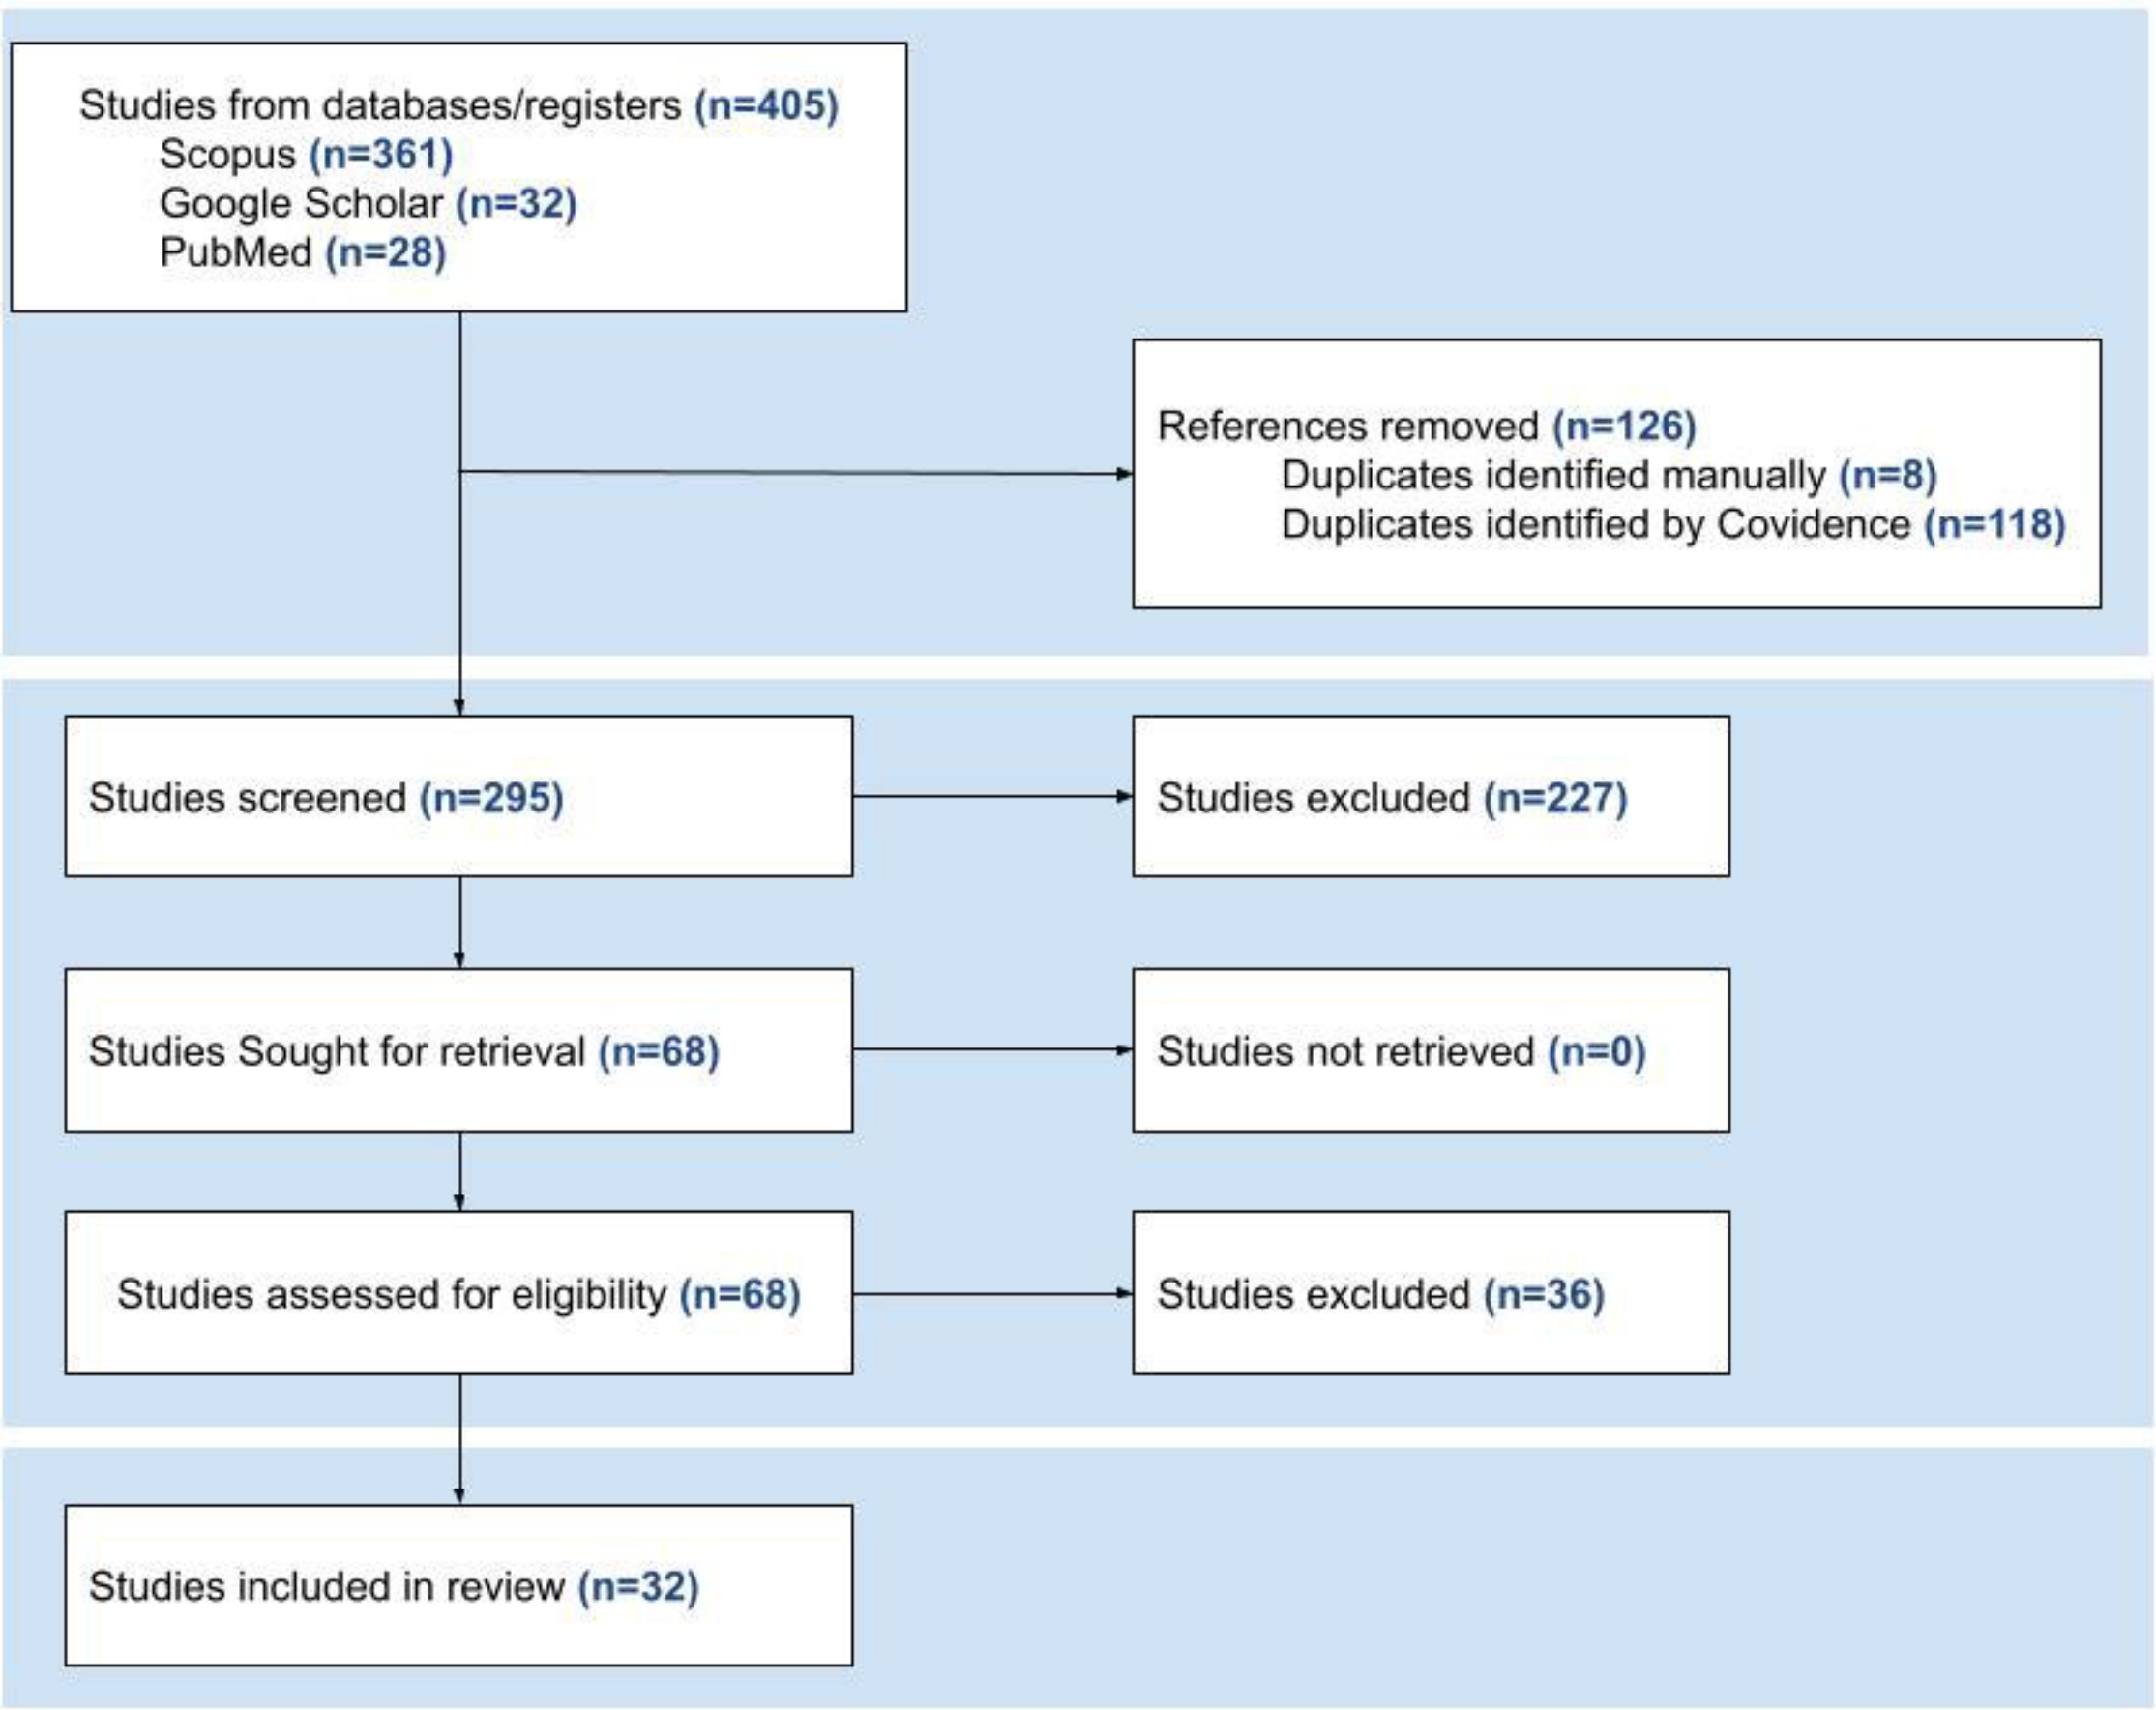

Source: https://medrxiv.org/content/10.1101/2024.07.25.24311022v1.full.pdf
